# Supplementary material
Source: MDPI journal article supplement (https://www.mdpi.com/2075-163X/13/8/1013)
Supplement: s1 [file s1]

**Table S1.** Resistivity values of representative stratigraphic and lithological samples in research area and stratum thickness.

| Stratum    | Lithology       | Quantity | $\rho(\Omega.m)$  | Average( $\Omega.m$ ) | Thickness (m) |
|------------|-----------------|----------|-------------------|-----------------------|---------------|
| Q          | claystone       | 33       | 78.59 ~ 197.27    | 90.83                 | 0~34          |
| P3l        | silty claystone | 31       | 159.4 ~ 575.1     | 269.5                 | 0~40          |
| P3 $\beta$ | basalt          | 32       | 1356.21 ~ 2374.42 | 1767.44               | 20~100        |
| P2m+q      | limestone       | 34       | 2696.79 ~ 6625.37 | 4625.62               | 163~440       |
| P2l        | silty claystone | 33       | 96.72 ~ 645.72    | 252.91                | 17~31         |
| C1b        | dolomite        | 33       | 1435.23 ~ 2779.4  | 2146.2                | 50~80         |
| C1jj       | bauxite         | 36       | 125.63 ~ 867.03   | 376.48                | 0~25          |
| $\in 2q$   | dolomite        | 32       | 2435.23 ~ 5779.4  | 3546.2                | 195~248       |

**Table S2.** Major elements (%) of Jiujialu Formation ore-bearing rock series, samples from the Xiaoyuan bauxite deposit .

| Sample                         | Zk0305-1 | Zk0305-2 | Zk0305-3 | Zk0504-1 | Zk0504-2 | Zk1708-1 | Zk1708-2 | Zk1708-3 | Zk0506-1 | Zk0506-2 |
|--------------------------------|----------|----------|----------|----------|----------|----------|----------|----------|----------|----------|
| Al <sub>2</sub> O <sub>3</sub> | 65.55    | 71.62    | 64.06    | 58.70    | 61.60    | 53.79    | 63.11    | 65.35    | 54.25    | 40.69    |
| SiO <sub>2</sub>               | 15.56    | 7.65     | 13.26    | 7.00     | 12.60    | 25.64    | 18.80    | 14.79    | 24.55    | 12.00    |
| Fe <sub>2</sub> O <sub>3</sub> | 0.30     | 0.74     | 3.56     | 11.99    | 5.95     | 1.73     | 2.37     | 0.95     | 3.11     | 19.68    |
| TS                             | 0.03     | 0.18     | 2.66     | 8.71     | 2.72     | 1.10     | 1.88     | 0.52     | 0.01     | 0.02     |
| TiO <sub>2</sub>               | 2.26     | 3.23     | 2.62     | 3.23     | 2.93     | 2.60     | 3.05     | 3.38     | 1.89     | 1.60     |
| LOI                            | 11.38    | 13.46    | 12.38    | 15.74    | 12.45    | 9.55     | 11.62    | 11.37    | 9.40     | 14.26    |
| Al/Si                          | 4.21     | 9.36     | 4.83     | 8.39     | 4.89     | 2.10     | 3.36     | 4.42     | 2.21     | 3.39     |
| Sample                         | Zk0608-1 | Zk0608-2 | Zk0608-3 | Zk0719-1 | Zk0719-2 | Zk0719-3 | Zk1508-1 | Zk1508-2 | Zk1508-3 | Zk1519-1 |
| Al <sub>2</sub> O <sub>3</sub> | 74.02    | 77.85    | 77.36    | 70.85    | 67.55    | 55.33    | 67.50    | 73.78    | 67.50    | 75.10    |
| SiO <sub>2</sub>               | 7.04     | 2.69     | 3.36     | 8.75     | 10.10    | 25.52    | 12.18    | 6.07     | 12.52    | 4.62     |
| Fe <sub>2</sub> O <sub>3</sub> | 0.67     | 0.47     | 0.51     | 1.23     | 3.32     | 1.15     | 0.40     | 0.73     | 0.76     | 0.75     |
| TS                             | 0.26     | 0.08     | 0.06     | 0.27     | 1.50     | 0.44     | 0.07     | 0.19     | 0.16     | 0.03     |
| TiO <sub>2</sub>               | 3.50     | 3.95     | 3.84     | 3.99     | 3.31     | 2.49     | 4.18     | 3.65     | 3.28     | 3.80     |
| Al/Si                          | 13.12    | 13.94    | 23.02    | 8.10     | 6.69     | 2.17     | 5.54     | 12.15    | 5.39     | 16.26    |
| LOI                            | 10.51    | 28.94    | 13.82    | 12.75    | 12.88    | 12.54    | 11.70    | 13.09    | 11.70    | 13.76    |
| Sample                         | Zk1519-2 | Zk1519-3 | Zk1706-1 | Zk1706-2 | Zk1706-3 | Zk1712-1 | Zk1712-2 | Zk1712-3 | Zk2304-1 | Zk2304-2 |
| Al <sub>2</sub> O <sub>3</sub> | 76.91    | 72.59    | 45.28    | 54.57    | 59.60    | 75.15    | 77.82    | 77.32    | 54.96    | 67.55    |
| SiO <sub>2</sub>               | 3.45     | 7.26     | 23.82    | 19.28    | 19.96    | 4.46     | 2.55     | 2.51     | 23.90    | 13.56    |
| Fe <sub>2</sub> O <sub>3</sub> | 0.88     | 0.71     | 9.92     | 5.95     | 1.79     | 0.99     | 0.78     | 0.75     | 2.82     | 0.94     |
| TS                             | 0.02     | 0.04     | 7.75     | 4.29     | 0.92     | 0.30     | 0.09     | 0.14     | -        | -        |
| TiO <sub>2</sub>               | 3.66     | 3.68     | 2.26     | 2.72     | 3.00     | 3.94     | 3.80     | 4.22     | 2.36     | 3.25     |
| Al/Si                          | 22.29    | 10.00    | 1.90     | 2.83     | 2.99     | 16.85    | 30.52    | 30.80    | 2.30     | 4.98     |
| LOI                            | 13.86    | 13.08    | 12.40    | 11.64    | 10.47    | 13.70    | 14.03    | 13.93    | 9.87     | 11.60    |

| Sample                         | Zk2304-3 | Zk2708-1 | Zk2708-2 | Zk2708-3 | Zk2712-1 | Zk2712-2 | Zk2712-3 | Zk2919-1 | Zk2919-2 | Zk2919-3 |
|--------------------------------|----------|----------|----------|----------|----------|----------|----------|----------|----------|----------|
| Al <sub>2</sub> O <sub>3</sub> | 60.34    | 64.70    | 70.31    | 65.62    | 73.97    | 68.72    | 77.68    | 73.17    | 76.36    | 69.47    |
| SiO <sub>2</sub>               | 20.26    | 15.95    | 10.64    | 13.80    | 4.44     | 10.46    | 2.02     | 6.10     | 3.35     | 2.79     |
| Fe <sub>2</sub> O <sub>3</sub> | 0.86     | 1.39     | 0.54     | 0.72     | 1.35     | 0.95     | 0.59     | 1.08     | 0.99     | 7.41     |
| TS                             | -        | 0.70     | 0.04     | 0.21     | 0.58     | 0.27     | 0.13     | 0.53     | 0.41     | 5.66     |
| TiO <sub>2</sub>               | 3.35     | 2.68     | 3.59     | 4.03     | 4.47     | 4.35     | 4.18     | 3.35     | 3.44     | 3.50     |
| Al/Si                          | 2.98     | 4.06     | 6.61     | 4.76     | 16.66    | 6.57     | 38.46    | 12.00    | 22.79    | 24.90    |
| LOI                            | 10.26    | 11.53    | 12.34    | 11.80    | 13.61    | 12.05    | 14.15    | 13.26    | 13.96    | 15.18    |
| Sample                         | Zk5115-1 | Zk5115-2 | Zk5115-3 | Zk5123-1 | Zk5123-2 | Zk5123-3 | Zk2412-1 | Zk2412-2 |          |          |
| Al <sub>2</sub> O <sub>3</sub> | 48.09    | 49.49    | 44.40    | 56.67    | 51.38    | 50.19    | 63.89    | 51.81    |          |          |
| SiO <sub>2</sub>               | 18.22    | 13.74    | 9.30     | 7.86     | 4.59     | 4.24     | 13.17    | 26.56    |          |          |
| Fe <sub>2</sub> O <sub>3</sub> | 11.96    | 16.80    | 23.86    | 17.99    | 20.02    | 20.94    | 2.12     | 1.45     |          |          |
| TS                             | 4.56     | 1.00     | 1.70     | 0.12     | 0.09     | 0.14     | 1.29     | 0.72     |          |          |
| TiO <sub>2</sub>               | 2.44     | 2.57     | 1.88     | 2.53     | 2.46     | 2.32     | 3.50     | 3.09     |          |          |
| Al/Si                          | 2.64     | 3.60     | 4.77     | 7.21     | 11.19    | 11.84    | 4.85     | 1.95     |          |          |
| LOI                            | 13.34    | 13.74    | 19.08    | 13.01    | 17.66    | 18.20    | 12.20    | 9.03     |          |          |

**Table S3.** Major (%), trace and rare earth elements (ppm) of Jiujiayu Formation Al-bearing rock series, and underlying Cambrian Qingxudong Formation dolomite, samples from the Xiaoyuan bauxite deposit.

| Sample                         | Xy01   | Xy02    | Xy03    | Xy04    | Xy05   | Xy06    | Xy07   | Xy08    | Xy09   | Xy10   |
|--------------------------------|--------|---------|---------|---------|--------|---------|--------|---------|--------|--------|
| Al <sub>2</sub> O <sub>3</sub> | 30.97  | 65.55   | 71.62   | 64.06   | 61.51  | 65.35   | 69.55  | 46.84   | 25.13  | 12.03  |
| SiO <sub>2</sub>               | 36.00  | 15.56   | 7.65    | 13.26   | 16.33  | 12.56   | 9.76   | 32.80   | 26.87  | 12.20  |
| TS                             | 7.49   | 0.03    | 0.18    | 2.66    | 1.54   | 0.44    | 0.12   | 0.29    | 17.55  | 0.15   |
| Ca                             | 0.06   | 0.02    | 0.01    | 0.04    | 0.02   | 0.04    | 0.01   | 0.03    | 0.04   | 1.67   |
| Fe                             | 9.83   | 0.10    | 0.32    | 0.25    | 1.45   | 0.40    | 0.19   | 1.01    | 18.70  | 39.70  |
| K                              | 4.34   | 2.96    | 1.38    | 4.24    | 1.86   | 4.23    | 0.76   | 4.20    | 4.62   | 0.67   |
| Mg                             | 0.41   | 0.09    | 0.04    | 0.17    | 0.06   | 0.19    | 0.02   | 0.12    | 0.19   | 1.32   |
| Na                             | 0.06   | 0.04    | 0.02    | 0.04    | 0.04   | 0.07    | 0.03   | 0.05    | 0.06   | 0.03   |
| Ti                             | 0.68   | 0.99    | 1.35    | 1.45    | 1.74   | 1.22    | 2.13   | 0.96    | 0.58   | 0.34   |
| As                             | 83.00  | 33.60   | 1.30    | 4.20    | 64.40  | 18.00   | 1.90   | 6.80    | 67.00  | 16.50  |
| B                              | 295.00 | 210.00  | 188.00  | 305.00  | 218.00 | 388.00  | 220.00 | 300.00  | 291.00 | 71.00  |
| Ba                             | 70.00  | 1510.00 | 1340.00 | 1560.00 | 960.00 | 1590.00 | 840.00 | 1310.00 | 20.00  | 940.00 |
| Cr                             | 93.00  | 103.00  | 104.00  | 75.00   | 77.00  | 69.00   | 80.00  | 87.00   | 49.00  | 40.00  |
| Cu                             | 189.50 | 9.60    | 2.60    | 41.50   | 224.00 | 191.00  | 229.00 | 91.50   | 209.00 | 4.40   |
| Ga                             | 23.30  | 39.00   | 42.50   | 36.80   | 36.70  | 31.80   | 25.70  | 35.10   | 32.20  | 22.30  |
| Hf                             | 6.00   | 9.30    | 13.20   | 13.10   | 12.50  | 9.20    | 14.90  | 7.30    | 4.20   | 1.80   |
| Li                             | 670.00 | 120.00  | 17.90   | 533.00  | 12.10  | 17.60   | 1.30   | 8.90    | 10.30  | 94.10  |

|          |        |        |          |          |          |        |        |        |        |         |
|----------|--------|--------|----------|----------|----------|--------|--------|--------|--------|---------|
| Nb       | 26.50  | 42.90  | 57.40    | 57.90    | 65.70    | 46.30  | 82.10  | 37.00  | 20.60  | 12.20   |
| Ni       | 159.50 | 12.40  | 2.90     | 51.80    | 588.00   | 52.30  | 6.60   | 31.00  | 51.80  | 31.60   |
| P        | 140.00 | 80.00  | 130.00   | 450.00   | 690.00   | 760.00 | 590.00 | 840.00 | 440.00 | 2430.00 |
| Pb       | 525.00 | 11.40  | 15.80    | 46.20    | 211.00   | 114.00 | 57.40  | 76.80  | 38.70  | 23.80   |
| Rb       | 26.60  | 24.20  | 13.60    | 29.90    | 26.50    | 55.20  | 10.20  | 58.90  | 73.20  | 21.20   |
| Sc       | 26.80  | 36.40  | 26.60    | 45.80    | 22.70    | 48.70  | 12.20  | 24.80  | 34.50  | 13.40   |
| Sr       | 55.10  | 30.90  | 35.60    | 276.00   | 362.00   | 523.00 | 247.00 | 725.00 | 386.00 | 3920.00 |
| Ta       | 2.07   | 3.29   | 4.47     | 4.57     | 5.19     | 3.65   | 6.15   | 2.85   | 1.54   | 0.92    |
| Th       | 8.92   | 29.60  | 21.90    | 39.30    | 43.30    | 53.40  | 34.20  | 34.50  | 19.85  | 17.45   |
| V        | 65.00  | 121.00 | 109.00   | 134.00   | 86.00    | 95.00  | 65.00  | 109.00 | 546.00 | 144.00  |
| Y        | 7.00   | 19.00  | 12.40    | 22.00    | 29.20    | 39.10  | 21.40  | 26.50  | 63.00  | 33.80   |
| Zr       | 213.00 | 313.00 | 414.00   | 394.00   | 409.00   | 304.00 | 490.00 | 244.00 | 160.00 | 61.50   |
| ΣLREE    | 30.52  | 23.44  | 36.18    | 388.34   | 610.65   | 810.99 | 273.29 | 641.99 | 236.37 | 195.14  |
| ΣHREE    | 9.26   | 16.14  | 10.95    | 23.68    | 29.43    | 48.56  | 21.22  | 29.79  | 48.77  | 29.82   |
| ΣREE     | 39.78  | 39.58  | 47.13    | 412.02   | 640.08   | 859.55 | 294.51 | 671.78 | 285.14 | 224.96  |
| EU*      | 0.47   | 0.43   | 0.52     | 0.76     | 0.56     | 0.61   | 0.55   | 0.70   | 0.76   | 0.75    |
| CE*      | 1.53   | 1.44   | 1.15     | 1.42     | 1.24     | 0.75   | 1.08   | 0.90   | 1.19   | 0.87    |
| (La/Yb)N | 1.12   | 0.65   | 1.87     | 9.83     | 16.04    | 21.04  | 9.87   | 23.52  | 4.62   | 8.93    |
| (La/Sm)N | 1.47   | 1.08   | 2.53     | 4.97     | 5.44     | 3.21   | 3.83   | 3.79   | 1.50   | 2.01    |
| (Gd/Yb)N | 0.47   | 0.63   | 0.54     | 0.87     | 1.03     | 2.42   | 0.97   | 2.10   | 2.51   | 3.07    |
| Sample   | Xyl1   | Xyl2   | Zk5123-1 | Zk5123-2 | Zk5123-3 |        |        |        |        |         |
| Al2O3    | 21.18  | 21.23  | 56.67    | 51.38    | 50.19    |        |        |        |        |         |
| SiO2     | 23.92  | 22.68  | 7.86     | 4.59     | 4.24     |        |        |        |        |         |
| TS       | 0.05   | 0.34   | 0.12     | 0.09     | 0.14     |        |        |        |        |         |
| Ca       | 2.26   | 8.78   | 0.04     | 0.48     | 0.25     |        |        |        |        |         |
| Fe       | 18.45  | 24.10  | 8.39     | 14.85    | 11.50    |        |        |        |        |         |
| K        | 3.21   | 0.03   | 0.02     | 0.10     | 0.08     |        |        |        |        |         |
| Mg       | 1.52   | 1.01   | 0.61     | 0.64     | 0.65     |        |        |        |        |         |
| Na       | 0.07   | 0.02   | 0.03     | 0.02     | 0.02     |        |        |        |        |         |
| Ti       | 0.63   | 0.08   | 1.59     | 0.96     | 1.16     |        |        |        |        |         |
| As       | 2.70   | 1.70   | 48.60    | 3.60     | 1.60     |        |        |        |        |         |
| B        | 154.00 | 12.00  | -        | -        | -        |        |        |        |        |         |
| Ba       | 970.00 | 790.00 | 30.00    | 60.00    | 50.00    |        |        |        |        |         |
| Cr       | 95.00  | 10.00  | 90.00    | 72.00    | 98.00    |        |        |        |        |         |
| Cu       | 0.20   | 5.10   | 91.90    | 7.30     | 38.70    |        |        |        |        |         |
| Ga       | 31.70  | 11.75  | 29.90    | 22.10    | 26.60    |        |        |        |        |         |
| Hf       | 3.20   | 0.70   | 11.00    | 7.10     | 8.40     |        |        |        |        |         |

|          |         |         |        |         |         |
|----------|---------|---------|--------|---------|---------|
| Li       | 159.50  | 88.30   | 240.00 | 139.50  | 141.50  |
| Nb       | 23.40   | 3.40    | 58.90  | 37.60   | 44.50   |
| Ni       | 49.50   | 53.40   | 43.50  | 34.80   | 29.70   |
| P        | 1500.00 | 290.00  | 430.00 | 580.00  | 870.00  |
| Pb       | 18.30   | 50.80   | 60.10  | 32.10   | 18.20   |
| Rb       | 35.60   | 0.60    | 0.10   | 1.60    | 1.40    |
| Sc       | 17.80   | 10.80   | 34.80  | 49.60   | 41.60   |
| Sr       | 1595.00 | 3040.00 | 200.00 | 199.50  | 253.00  |
| Ta       | 1.75    | 0.20    | 4.49   | 3.08    | 3.34    |
| Th       | 17.55   | 3.72    | 33.90  | 48.80   | 49.60   |
| V        | 99.00   | 170.00  | 123.00 | 115.00  | 133.00  |
| Y        | 37.10   | 27.80   | 18.10  | 39.30   | 33.50   |
| Zr       | 111.50  | 35.10   | 356.00 | 225.00  | 277.00  |
| ΣLREE    | 209.68  | 34.59   | 513.00 | 1283.56 | 1160.09 |
| ΣHREE    | 33.75   | 18.63   | 93.41  | 201.67  | 160.90  |
| ΣREE     | 243.43  | 53.22   | 606.41 | 1485.23 | 1320.99 |
| EU*      | 0.71    | 0.94    | 0.56   | 0.57    | 0.59    |
| CE*      | 1.18    | 1.24    | 1.32   | 1.11    | 1.60    |
| (La/Yb)N | 6.35    | 1.43    | 10.30  | 17.20   | 16.03   |
| (La/Sm)N | 1.77    | 0.80    | 4.34   | 3.42    | 4.23    |
| (Gd/Yb)N | 2.84    | 2.03    | 0.98   | 2.11    | 1.72    |

---

$\Sigma\text{REE} = \Sigma\text{LREE} + \Sigma\text{HREE}$ ;  $\Sigma\text{LREE} = \Sigma(\text{La}-\text{Eu})$ ;  $\Sigma\text{HREE} = (\text{Gd}-\text{Lu})$ ;  $\text{Ce}/\text{Ce}^* = (2\text{Ce}/\text{CeN})/(\text{La}/\text{LaN} + \text{Pr}/\text{PrN})$ ;  $\text{Eu}/\text{Eu}^* = (2\text{Eu}/\text{EuN})/(\text{Sm}/\text{SmN} + \text{Gd}/\text{GdN})$ ;  $(\text{La}/\text{Yb})\text{N} = (\text{La}/\text{LaN})/(\text{Yb}/\text{YbN})$ ;  $(\text{La}/\text{Sm})\text{N} = (\text{La}/\text{LaN})/(\text{Sm}/\text{SmN})$ ;  $(\text{Gd}/\text{Yb})\text{N} = (\text{Gd}/\text{GdN})/(\text{Yb}/\text{YbN})$ ; N: normalization of chondrite, normalization factors are from Sun and McDonough (1989)

## References

Sun, S.S.; McDonough, W.F. Chemical and isotopic systematics of oceanic basalts: implications for mantle composition and processes. *Geological Society, London, Special Publications* **1989**, *42*(1), 313–345.
